# Supplementary material for: NRF2-dependent regulation of the prostacyclin receptor PTGIR drives CD8 T cell exhaustion
Source: PubMed Central journal article supplement — bioRxiv. 2024 Jun 28:2024.06.23.600279. Preprint. [Version 1] doi: 10.1101/2024.06.23.600279 (PMC11230227; doi:10.1101/2024.06.23.600279), 2024-06-28
Supplement: media-5.pdf [file media-5.pdf]

Supplementary Materials for:  
**NRF2-dependent regulation of the prostacyclin receptor PTGIR drives CD8 T  
cell exhaustion**

Dahabieh *et al.*

\*Corresponding author. Email: [russell.jones.@vai.org](mailto:russell.jones.@vai.org)

**This PDF file includes:**

Figs. S1-S7  
Tables S1-S4

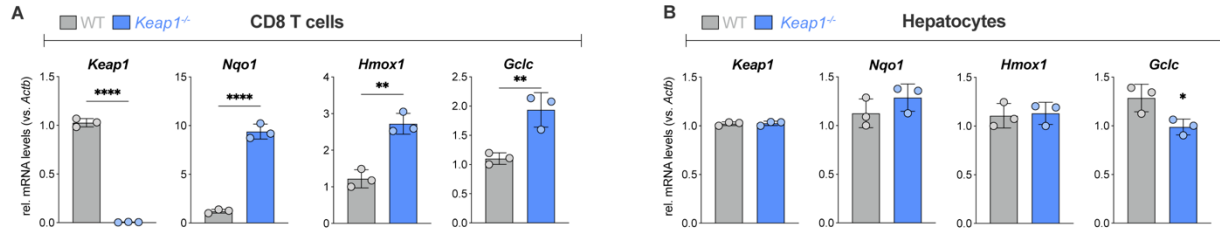

**Fig. S1. Validation of *Keap1* deletion in CD8 T cells. (A-B)** Relative mRNA expression for *Keap1*, and NRF2 transcriptional targets *Nqo1*, *Hmox1*, and *Gclc* in (A) CD8 T cells and (B) hepatocytes from *Keap1*<sup>fl/fl</sup> (WT) and *Cd4*<sup>Cre+</sup> *Keap1*<sup>fl/fl</sup> (*Keap1*<sup>-/-</sup>) mice (mean±SEM, n=3). \**P*<0.05, \*\**P*<0.01, \*\*\*\**P*<0.0001.

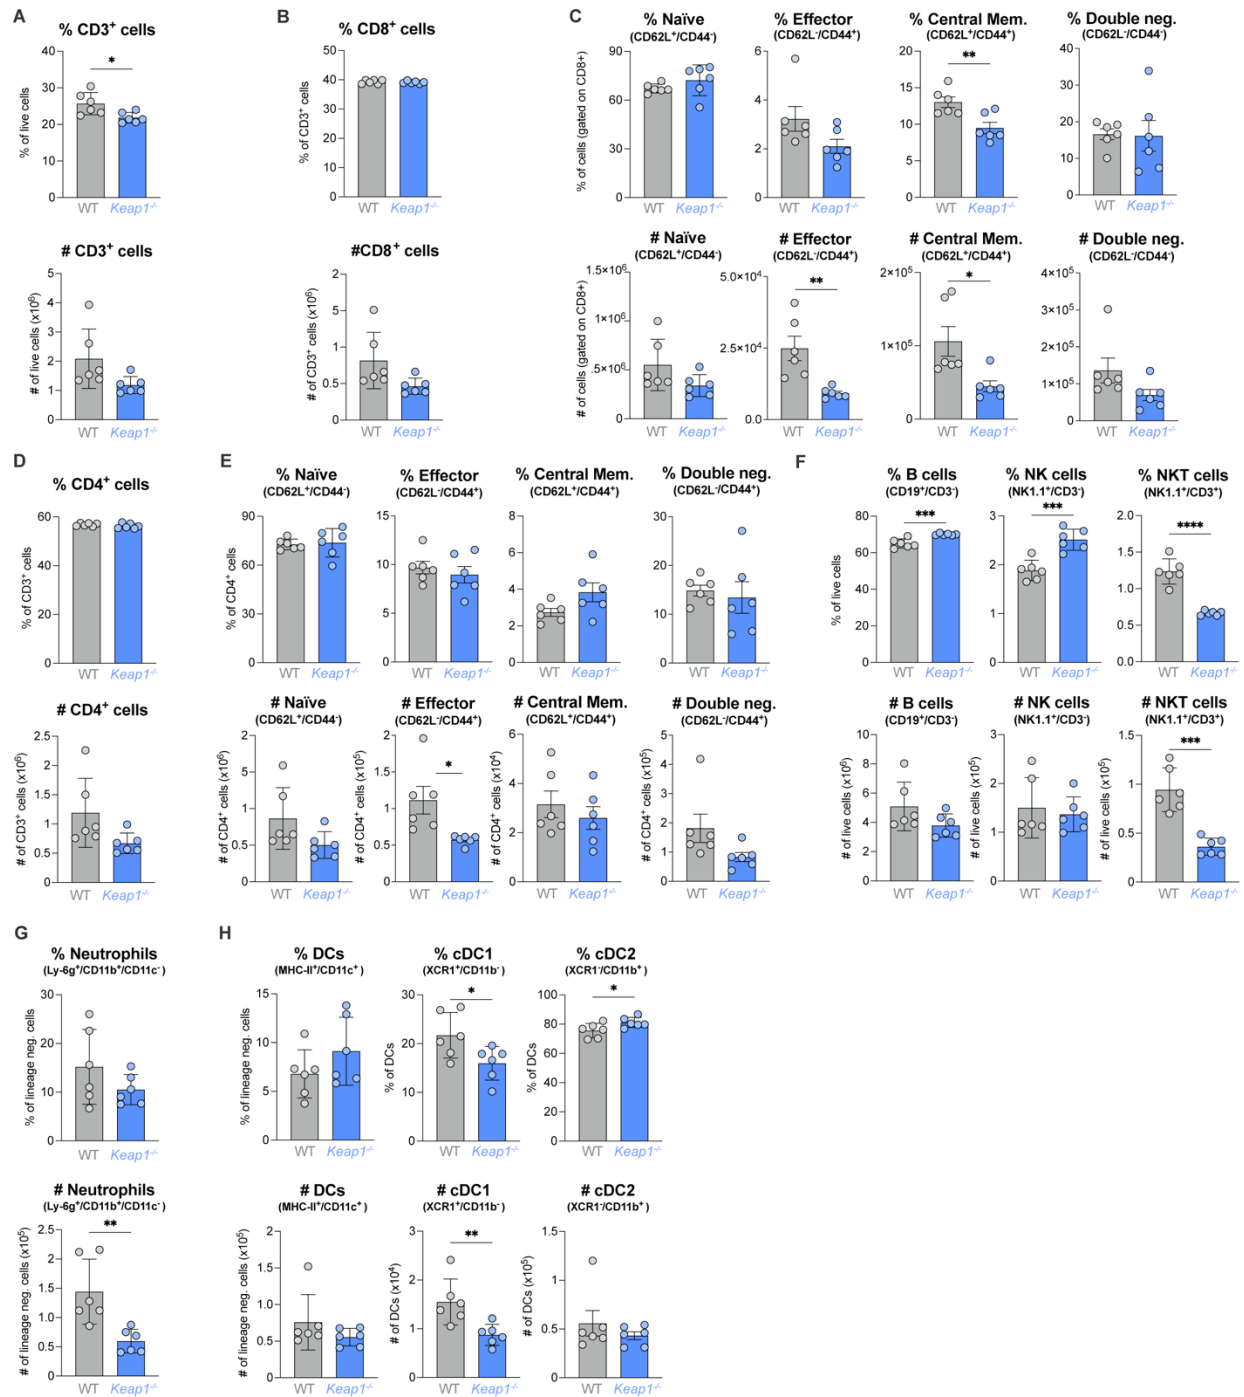

**Fig. S2. Immunophenotyping of splenocyte populations from *Keap1<sup>fl/fl</sup>* (WT) and *Cd4<sup>Cre+</sup>Keap1<sup>fl/fl</sup>* (*Keap1<sup>-/-</sup>*) mice. (A-B) Percent (top) and number (bottom) of splenic (A) CD3<sup>+</sup> T cells and (B) CD8<sup>+</sup> (gated on CD3<sup>+</sup>) T cells from WT and *Keap1<sup>-/-</sup>* mice aged 8-12 weeks (mean±SEM, n=6). (C) Percent (top) and number (bottom) of naïve, effector, central memory, and CD44<sup>-</sup>**

CD62L<sup>-</sup> (double negative) subsets of CD8<sup>+</sup> T cells in the spleens of mice as in (A). **(D-E)** CD4<sup>+</sup> T cells populations in WT and *Keap1*<sup>-/-</sup> mice. (D) Percent (top) and number (bottom) of CD4<sup>+</sup> (gated on CD3<sup>+</sup>) T cells from WT and *Keap1*<sup>-/-</sup> mice aged 8-12 weeks (mean±SEM, n=6). **(E)** Percent (top) and number (bottom) of naïve, effector, central memory, and CD44<sup>-</sup>CD62L<sup>-</sup> (double negative) subsets of CD4<sup>+</sup> T cells in the spleens of mice as in (D). **(F-H)** Percent (top) and number (bottom) of **(F)** B cells, Natural Killer (NK), and Natural Killer (NKT) T cells, **(G)** neutrophils, and **(H)** total CD11c<sup>+</sup> dendritic cells (DCs) and conventional DC1 (cDC1) and DC2 (cDC2) subsets from WT and *Keap1*<sup>-/-</sup> mice aged 8-12 weeks (mean±SEM, n=6). \**P*<0.05, \*\**P*<0.01, \*\*\**P*<0.001, \*\*\*\**P*<0.0001.

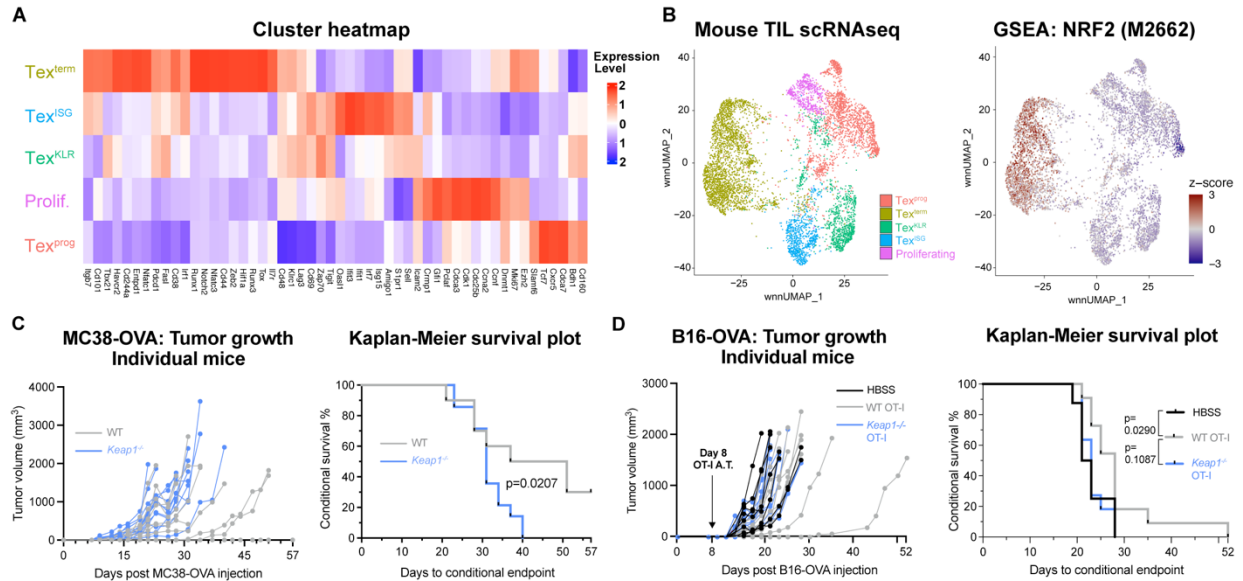

**Fig. S3. scRNA-seq cluster analysis and impact of *Keap1* deletion in T cells on tumor growth and survival.** (A) Heatmap of gene expression markers for progenitor exhausted ( $\text{Tex}^{\text{prog}}$ ), terminally exhausted ( $\text{Tex}^{\text{term}}$ ), exhausted killer cell lectin-like receptor-expressing ( $\text{Tex}^{\text{KLR}}$ ), exhausted IFN-I stimulated gene expressing ( $\text{Tex}^{\text{ISG}}$ ), and proliferating (prolif)  $\text{CD8}^+$  TIL isolated from B16-OVA tumors (related to Figure 2A). (B) Weighted nearest neighbor UMAP for  $\text{CD8}^+$  TIL clusters described in (A) and embedding of GSEA for NRF2 transcriptional target signature (M2662) across clusters. (C) Individual growth curves for MC38-OVA tumors in WT and *Keap1*<sup>-/-</sup> mice. Right, Kaplan-Meier (KM) survival curves for time to tumor endpoint (>1500 mm<sup>3</sup>) for MC38-OVA tumors grown in WT and *Keap1*<sup>-/-</sup> mice. (D) Individual growth curves for B16-OVA tumors following adoptive transfer of WT or *Keap1*<sup>-/-</sup> OT-I  $\text{CD8}^+$  T cells at 8 dpi. Right, Kaplan-Meier (KM) survival curves for time to tumor endpoint (>1500 mm<sup>3</sup>) for B16-OVA tumors.

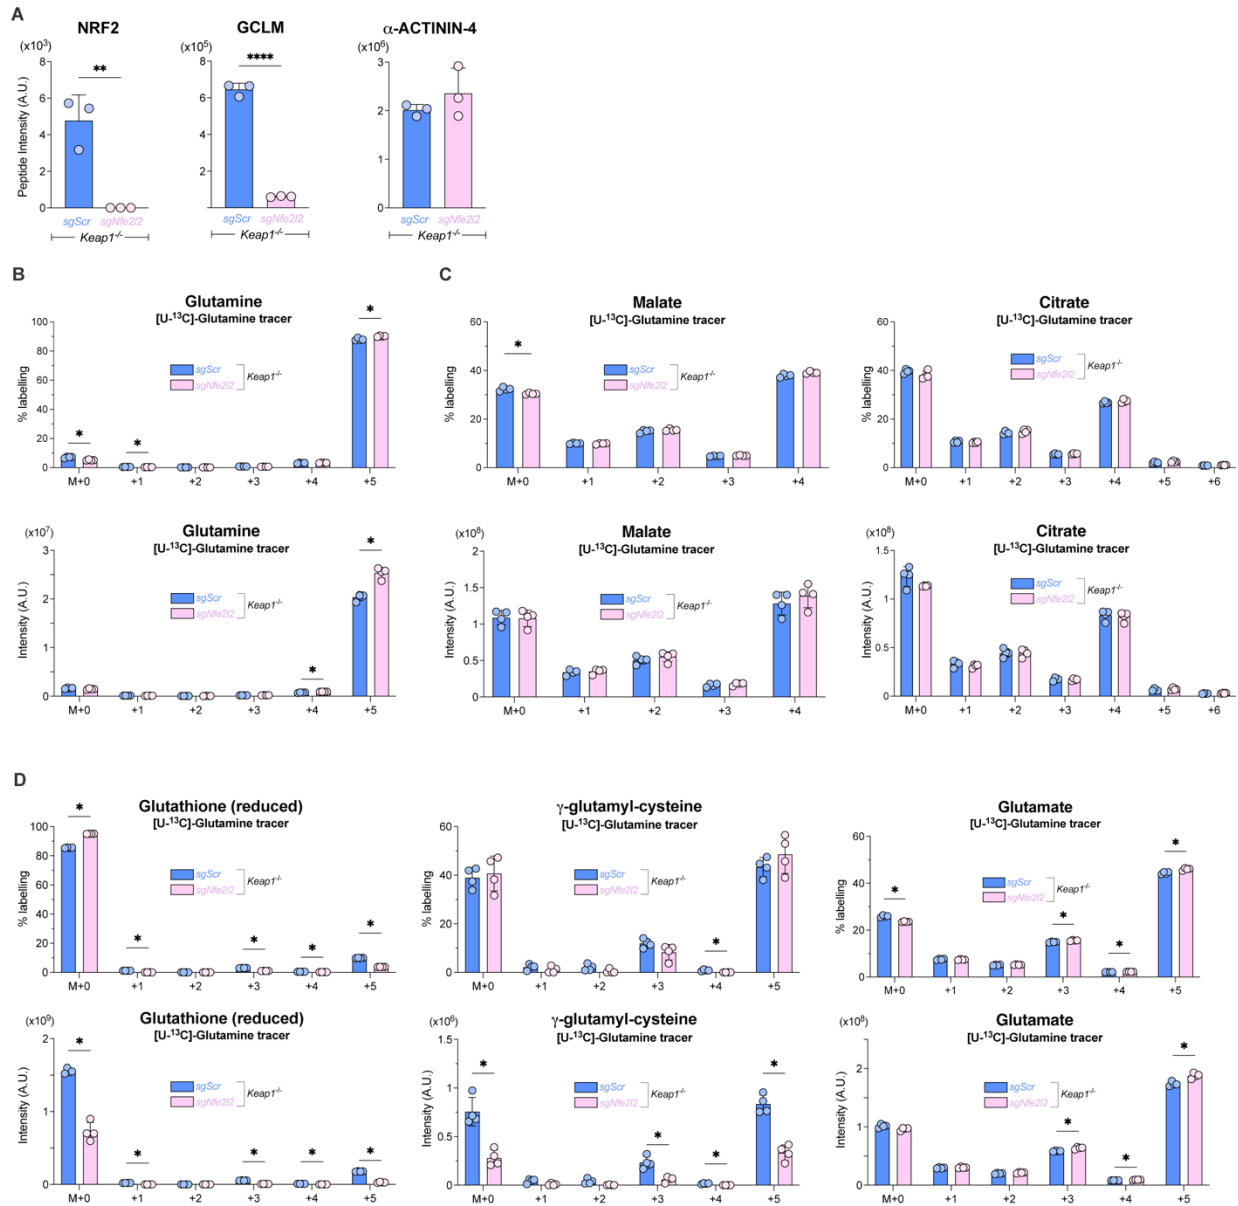

**Fig. S4. Proteomic and metabolic profiling of *Keap1*<sup>-/-</sup> CD8 T cells.** (A) Raw peptide intensities for NRF2, GCLM, and ACTN4 in *Keap1*<sup>-/-</sup> CD8<sup>+</sup> P14 T cells that received *Nfe2l2*-targeting (*sgNfe2l2*) or scrambled control (*sgScr*) sgRNAs (mean±SEM, n=3). (B-D) Mass isotopologue distribution (MID) for intracellular metabolites from *sgNfe2l2* and *sgScr* *Keap1*<sup>-/-</sup> P14 T cells following culture with [U-<sup>13</sup>C]-Glutamine (mean±SEM, n=4). Shown are the percent labelling (top) and intensities (bottom) for indicated isotopologues for (B) Glutamine, (C) Malate and

Citrate, and **(D)** Glutathione (reduced),  $\gamma$ -glutamyl cysteine, and Glutamate. \* $P < 0.05$ , \*\* $P < 0.01$ ,  
\*\*\* $P < 0.0001$ .

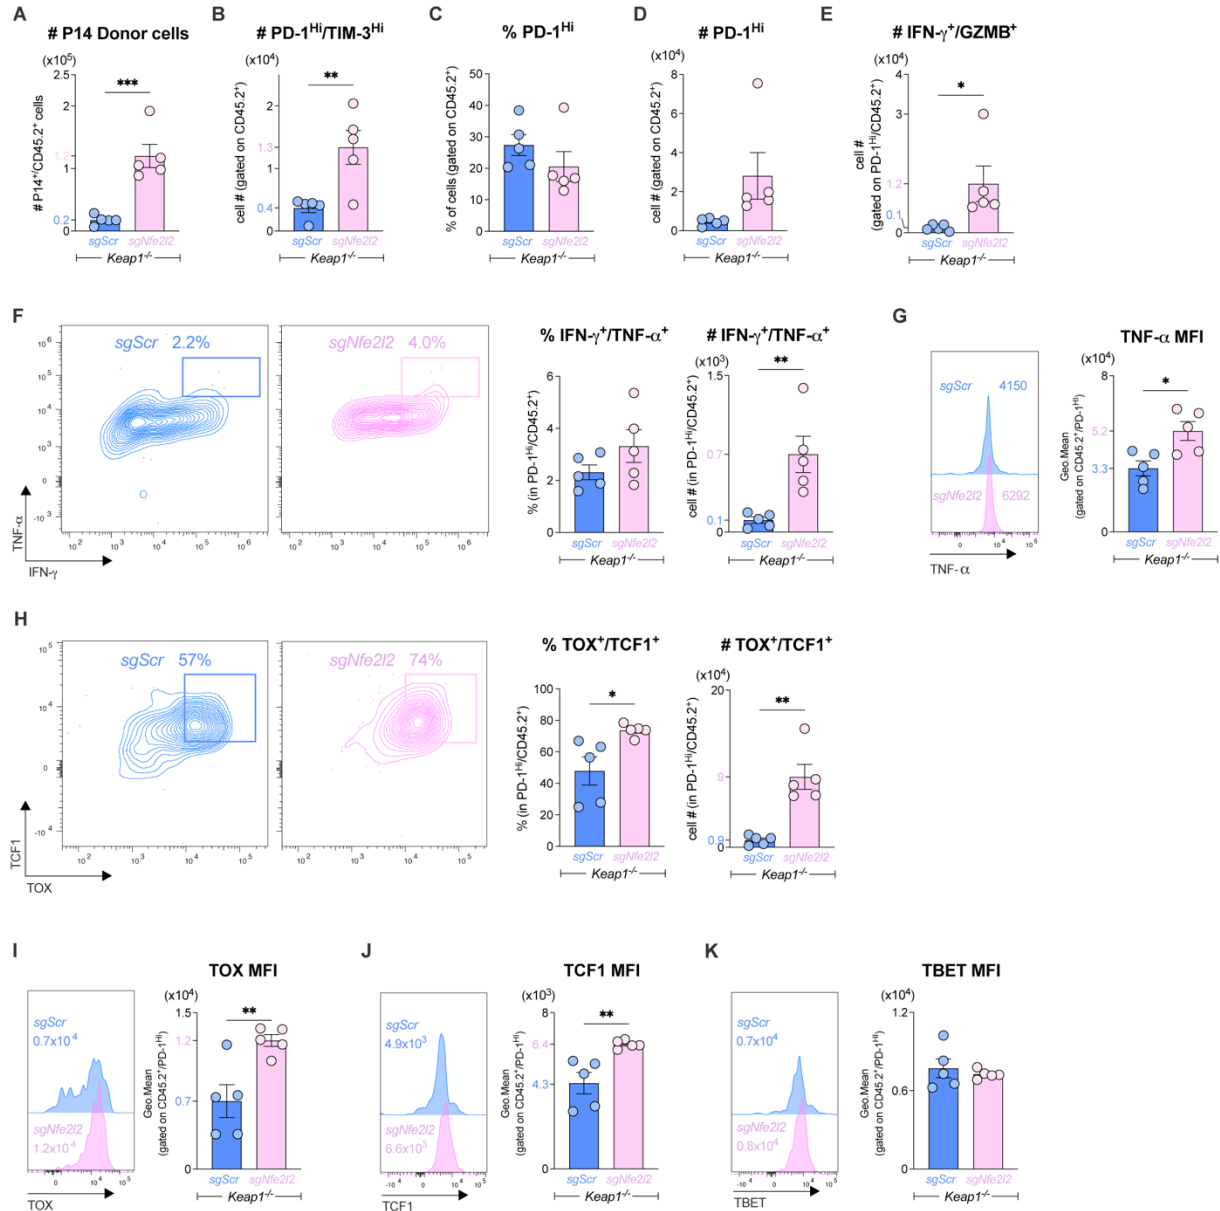

**Fig. S5. Immunophenotyping of *Keap1*<sup>-/-</sup> *sgScr* and *sgNfe2l2* P14 cells following LCMV CL13 infection.** (A-E) Bar graphs quantifying (A) the number of P14 (CD45.2<sup>+</sup>) donor cells, (B) number of PD-1<sup>Hi</sup>TIM-3<sup>Hi</sup> donor P14 cells, (C) percentage of PD-1<sup>Hi</sup> donor P14 cells, (D) number of PD-1<sup>Hi</sup> donor P14 cells, and (E) number of IFN- $\gamma$ <sup>+</sup>GZMB<sup>+</sup> P14 cells from the spleen of LCMV CL13-infected mice (7 dpi) that received *sgNfe2l2* or *sgScr* *Keap1*<sup>-/-</sup> P14 (CD45.2<sup>+</sup>) donor T cells at -1 dpi (mean $\pm$ SEM, n=5). (F) Quantification of the percentage and number of polyfunctional (IFN-



$\gamma^+$ TNF- $\alpha^+$ ) PD-1<sup>Hi</sup> *sgNfe2l2* or *sgScr Keap1<sup>-/-</sup>* P14 CD8 T cells from the spleen of LCMV CL13-infected mice (7 dpi). **(G)** Representative histograms and bar graph of MFI for TNF- $\alpha$  expression by PD-1<sup>Hi</sup> donor cells from (F) at 7 dpi (mean $\pm$ SEM, n=5/sample). **(H)** Quantification of the percentage and number of TOX<sup>+</sup>TCF1<sup>+</sup> PD-1<sup>Hi</sup> *sgNfe2l2* or *sgScr Keap1<sup>-/-</sup>* P14 CD8 T cells from the spleen of LCMV CL13-infected mice at 7 dpi (mean $\pm$ SEM, n=5). **(I-K)** Representative histograms and bar graph of MFI for (I) TOX, (J) TCF1, and (K) TBET expression by PD-1<sup>Hi</sup> donor cells from (F) at 7 dpi (mean $\pm$ SEM, n=5/sample). \* $P$ <0.05, \*\* $P$ <0.01, \*\*\* $P$ <0.001.

**A** Enriched in *Keap1*<sup>-/-</sup> P14  
(Top 10 C2-curated gene sets)

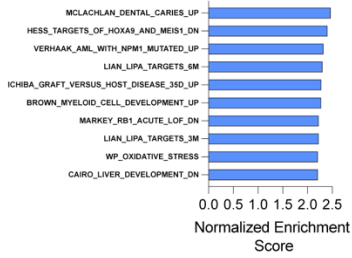

**B** Enriched in WT P14  
(Top 10 C2-curated gene sets)

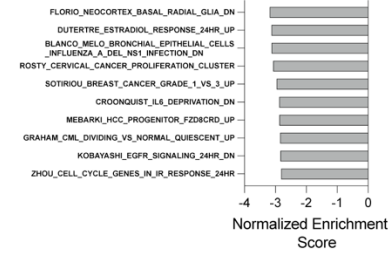

**C** Enriched in *Keap1*<sup>-/-</sup> P14  
(Top 10 C6- oncogenic signatures)

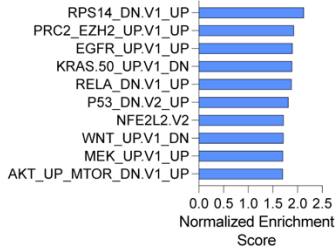

**D** Enriched in WT P14  
(Top 10 C6- oncogenic signatures)

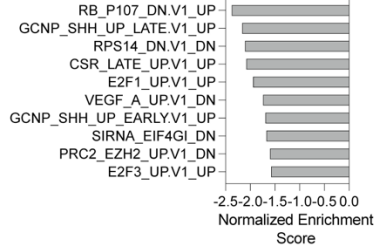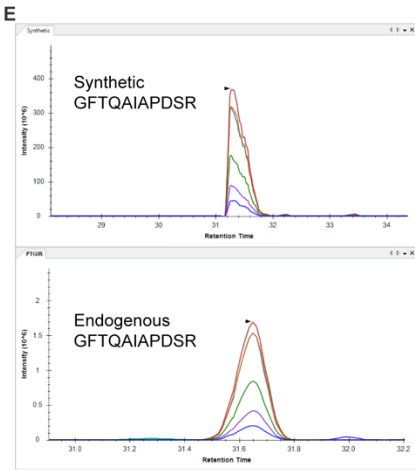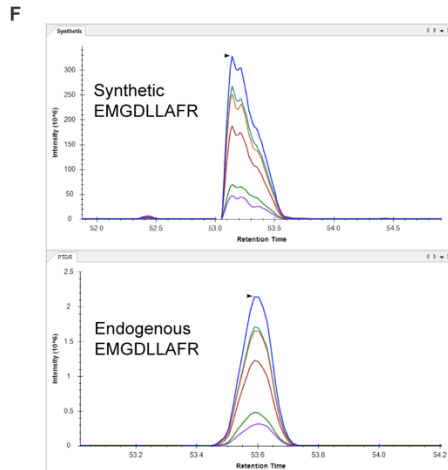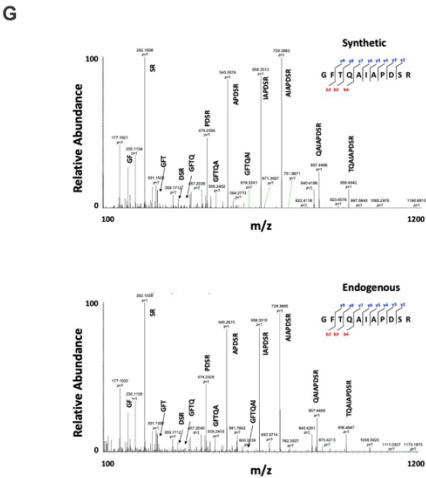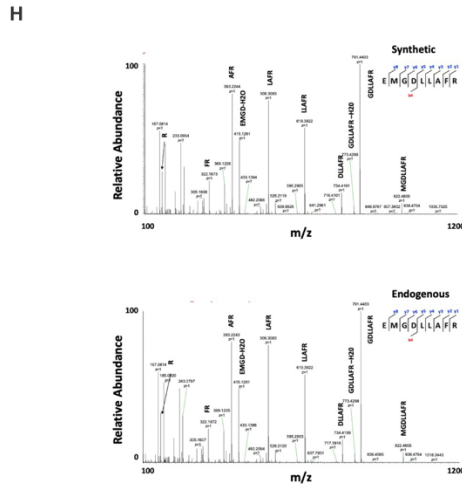

**Fig. S6. Enriched gene sets in *Keap1*<sup>-/-</sup> versus WT P14 cells and mass spectrometry validation of PTGIR peptides. (A-D)** Top 10 enriched pathways for (A-B) MSigDB C2 (curated) gene sets and (C-D) MSigDB C6 (oncogenic signature) gene sets in *Keap1*<sup>-/-</sup> versus WT P14 T cells following LCMV infection (7 dpi). Data are plotted as Normalized Enrichment Score (NES) for each pairwise comparison. (E-F) Representative PRM transition traces for the synthetic (top) and endogenous (bottom) PTGIR peptides (E) GFTQAIAPDSR and (F) EMGDLLAFR. (G-H) Representative MS2 spectra of the synthetic (top) and endogenous (bottom) peptides (G) GFTQAIAPDSR and (H) EMGDLLAFR of PTGIR.

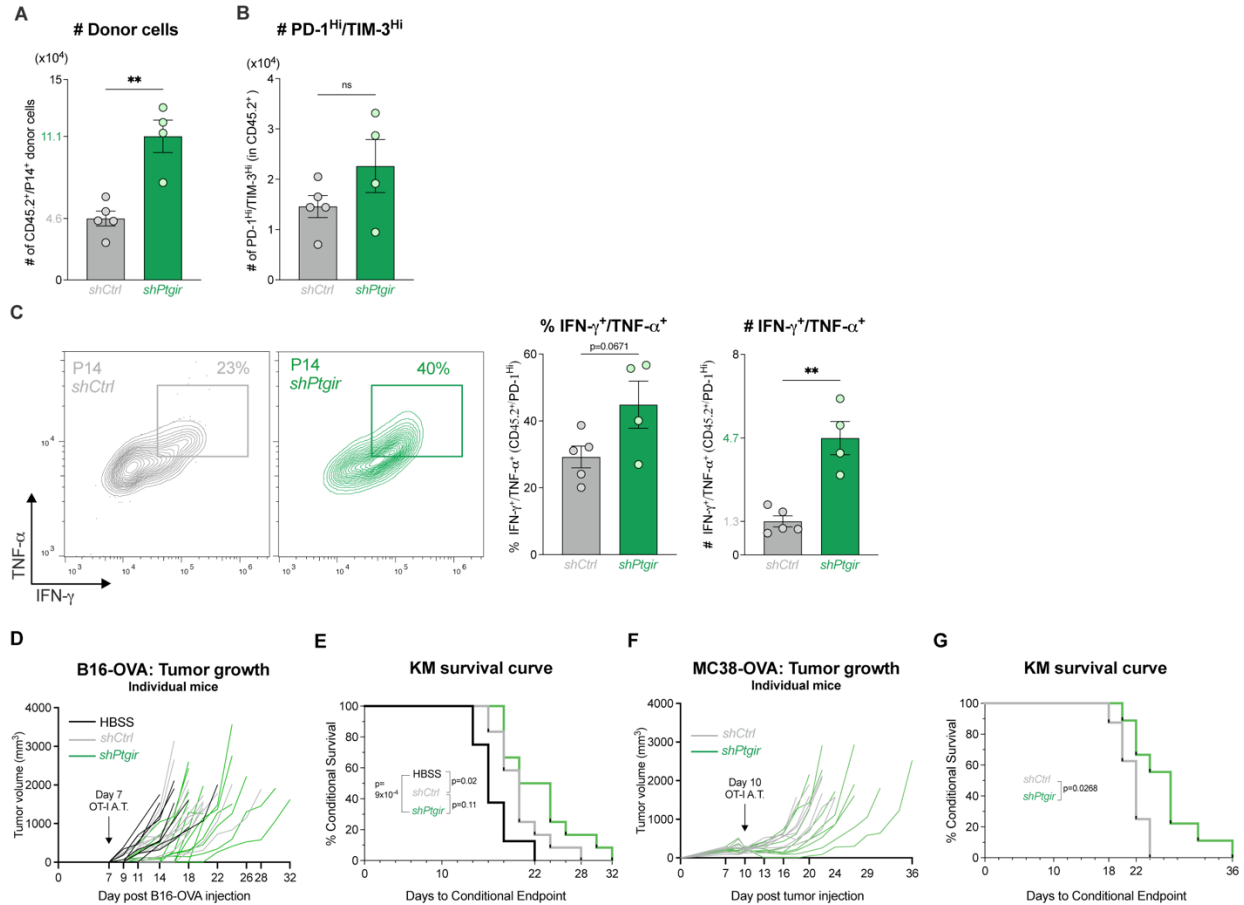

**Fig. S7. *Ptgir* knockdown improves anti-viral CD8 T cell responses and attenuates tumor growth.** (A) Bar graph quantifying the number of control (*shCtrl*) and *Ptgir* knockdown (*shPtgir*) P14 donor cells in the spleen of LCMV CL13-infected mice at 8 dpi (mean $\pm$ SEM, n=4-5/sample). CD45.2 is a donor cell marker expressed by P14 T cells. (B) Bar graph of PD-1<sup>Hi</sup>TIM-3<sup>Hi</sup> *shCtrl*- versus *shPtgir*-expressing P14 T cells from cells in (A). (C) Quantification of the percentage and number of polyfunctional (IFN- $\gamma$ <sup>+</sup>TNF- $\alpha$ <sup>+</sup>) PD-1<sup>Hi</sup> *shCtrl*- versus *shPtgir*-expressing P14 T donor cells from LCMV CL13-infected mice at 8 dpi (mean $\pm$ SEM, n=4-5/sample). (D) Individual growth curves for B16-OVA tumors following adoptive transfer of OT-I CD8 T cells expressing control (*shCtrl*) and *Ptgir* (*shPtgir*) shRNAs at 7 dpi. Right, Kaplan-Meier (KM) survival curves for time to tumor endpoint (>1500 mm<sup>3</sup>) for B16-OVA tumors. (E) Individual growth curves for MC38-

OVA tumors following adoptive transfer of OT-I CD8 T cells expressing control (*shCtrl*) and *Ptgir* (*shPtgir*) shRNAs at 10 dpti. *Right*, Kaplan-Meier (KM) survival curves for time to tumor endpoint (>1500 mm<sup>3</sup>) for MC38-OVA tumors. \* $P < 0.05$ , \*\* $P < 0.01$ .

**Table S1: Gene Set Enrichment Analysis (GSEA) of the oncogenic signature gene sets (MSigDB C6 gene set) enriched in Tex versus Teff cell clusters.** RNA-seq data are mined from GSE89307, GSE84820, and GSE86881. Refer to first tab of excel sheet for detailed description of column headings in subsequent data tab.

**Table S2: qPCR, shRNA and sgRNA oligonucleotide sequences.** 5' to 3' oligonucleotide sequences used for qPCR, CRISPR-Cas9 mediated knockout, and shRNA-mediated knockdown. Q denotes primers used for qPCR, and F and R denote forward and reverse primers, respectively.

**Table S3: Differential gene expression analysis from RNA-seq of adoptively transferred *Keap1*<sup>-/-</sup> versus WT P14 cells, isolated 7 days post LCMV Armstrong infection.** Refer to first tab of excel sheet for detailed description of column headings in subsequent data tab.

**Table S4: C2, C5, C6, C7, NFE2L2.v2 and H Gene set enrichment analysis (GSEA) from RNA-seq of *Keap1*<sup>-/-</sup> versus WT P14<sup>+</sup> CD8<sup>+</sup> T cells upon LCMV Armstrong infection.** A Positive or negative normalized enrichment score (NES) indicates a gene set enrichment in *Keap1*<sup>-/-</sup> cells or WT cells, respectively. Refer to first tab of excel sheet for detailed description of column headings in subsequent data tabs.
